# Supplementary material
Source: PubMed Central journal article supplement (PMC3663925)
Supplement: NIHMS458417-supplement-1.pdf [file NIHMS458417-supplement-1.pdf]

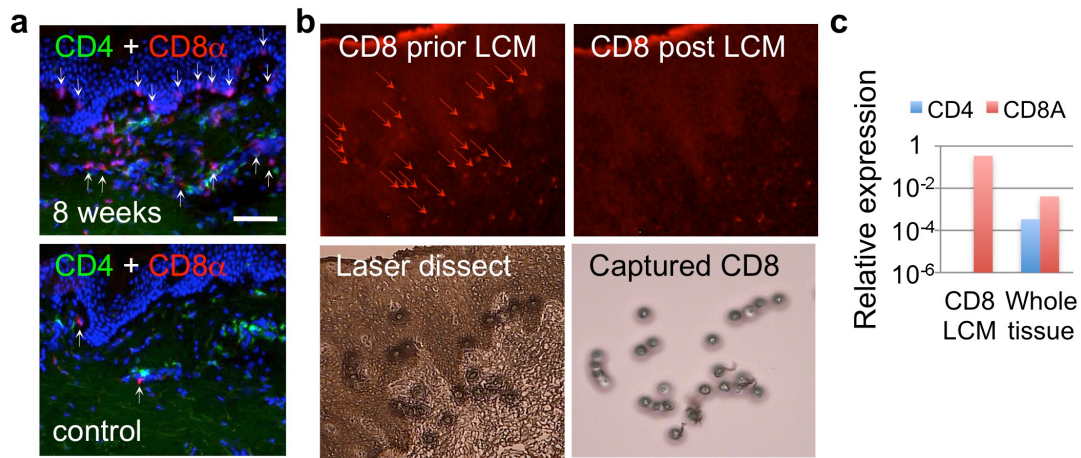

### Supplementary Figure 1

Laser capture microdissection of individual CD8<sup>+</sup> T cells in genital tissue. **a**, CD8<sup>+</sup> T cells (red), but not CD4<sup>+</sup> T cells (green) persisted at the dermal-epidermal junction (DEJ) in skin tissue obtained 8 weeks post-healing of a genital herpes lesion (top); matching control tissue biopsied at the same time in the contralateral genital site (bottom). Arrows denote CD8<sup>+</sup> T cells localized at DEJ (DEJ CD8, top, downward arrows), near blood vessel in the dermis (BV CD8, top, upward arrows) from a biopsy tissue 8 weeks after lesion completely healed, and CD8<sup>+</sup> T cells in matching control tissue (bottom, upward arrows). **b**, Laser capture microdissection of CD8<sup>+</sup> T cells at a single cell level. The micrographs show fluorescence labeled CD8<sup>+</sup> T cells before (upper left) and after (upper right) laser dissection. The pattern of imprinted laser markers (lower left) matches with individually captured CD8<sup>+</sup> T cells (lower right). Arrows denote selection of CD8<sup>+</sup> T cells for microdissection. **c**, Purity of captured CD8<sup>+</sup> T cells. TaqMan PCR analysis shows both *CD4* and *CD8A* genes are expressed in whole tissue sections. Only *CD8A* is expressed in captured CD8<sup>+</sup> T cells. Expression normalized to *ACTB*. Bar: 100  $\mu$ m.

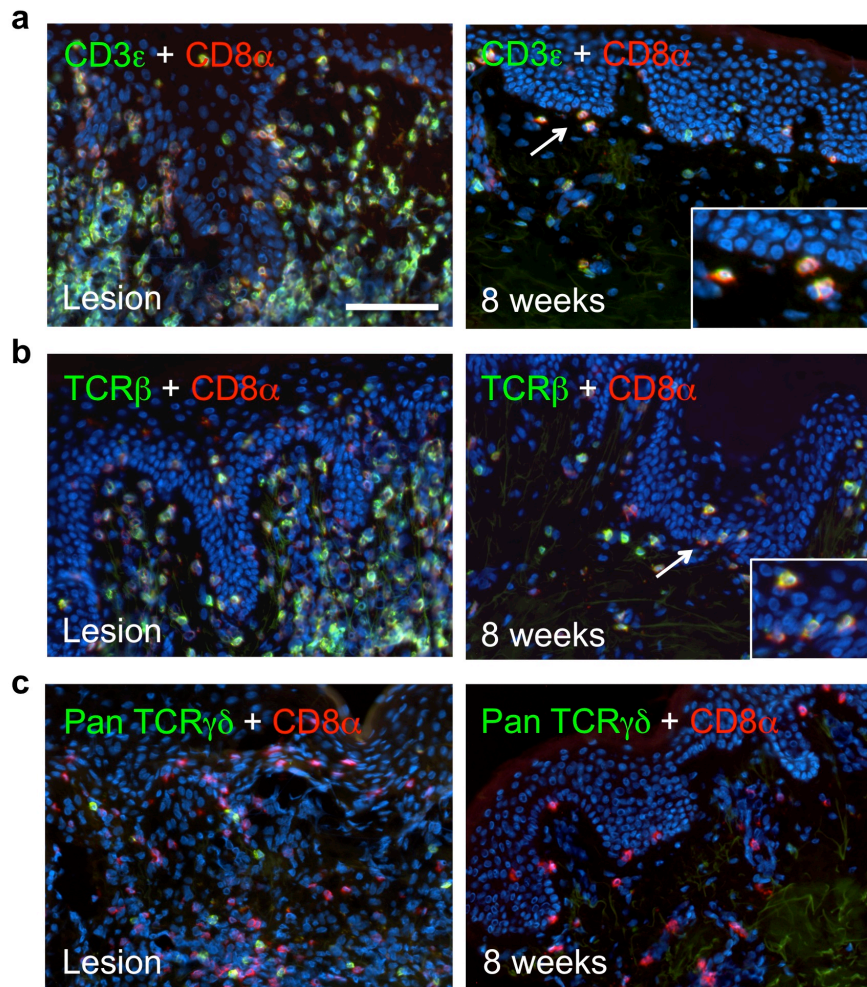

## Supplementary Figure 2

DEJ CD8 cells are TCR $\alpha\beta$  T cells, not TCR $\gamma\delta$  T cells.

**a&b**, Dual Immunofluorescence staining indicates DEJ CD8 cells co-expressing CD3 $\epsilon$  (yellow) (**a**) and TCR $\beta$  chain (yellow) (**b**) in both active lesion and 8 week post-healed tissue. Arrows denote enlarged area. **c**, DEJ CD8 cells express no TCR $\gamma\delta$  receptor during both active lesion and 8 week post-healed tissue. A few TCR $\gamma\delta$  T cells infiltrate in the dermis of genital skin during active herpes lesions. Bar: 100  $\mu$ m.

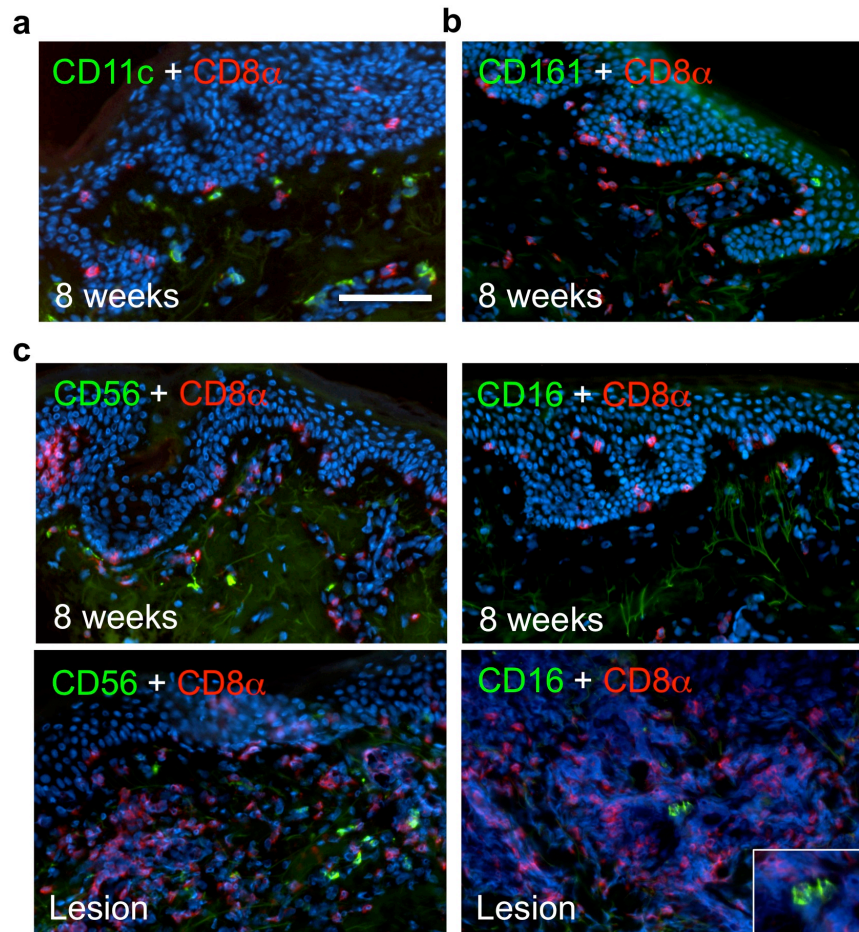

### Supplementary Figure 3

DEJ CD8 cells do not co-express markers specific for dendritic cells (DC), natural killer (NK) cells, nor nonconventional T cells. Dual immunofluorescence staining indicates that DEJ CD8 cells persisting in 8 weeks post-healed tissue express no CD11c, a marker for conventional DC (**a**); CD161, a marker for NK T and MAIT cells (**b**); nor NK cell markers for NK cells, CD56 and CD16 (**c**). NK cells positive for CD16 or CD56 are present in active lesions (**c**). Bar: 100  $\mu$ m.

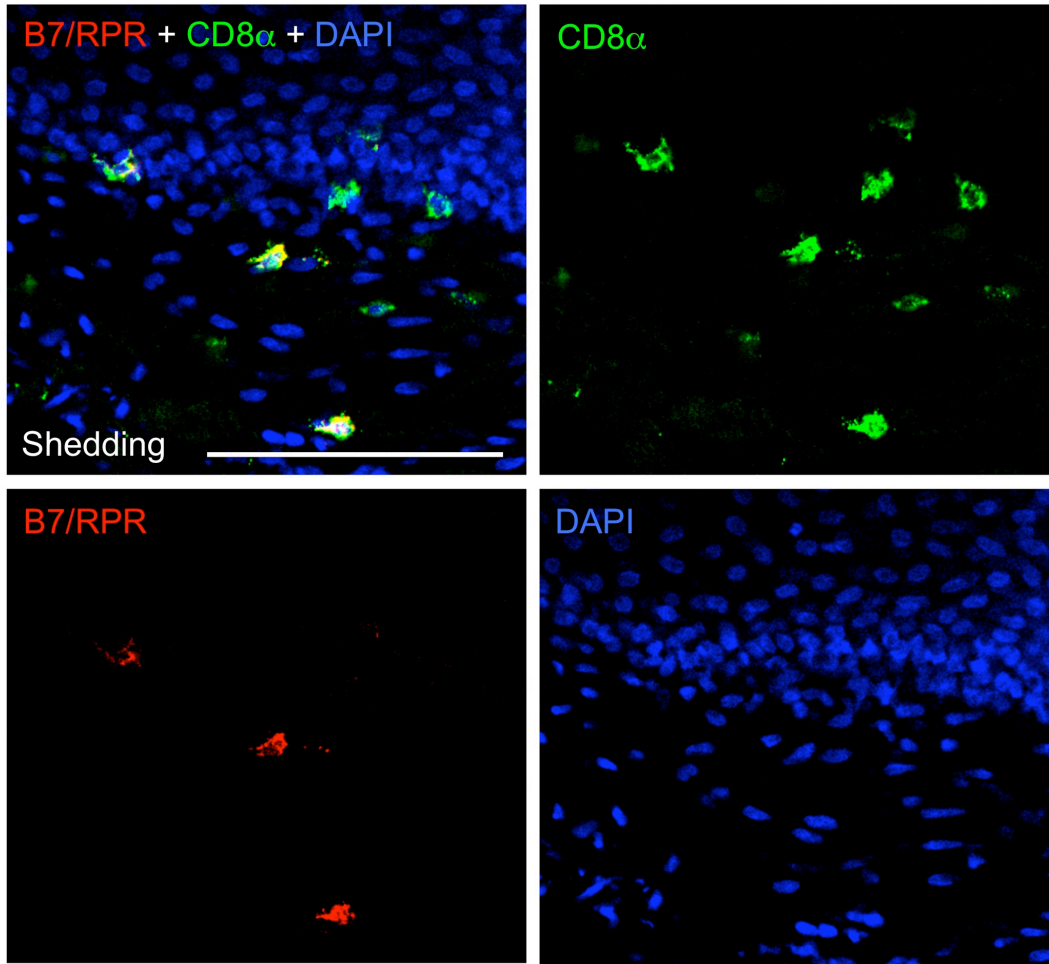

#### Supplementary Figure 4

*In situ* detection of HSV-specific CD8<sup>+</sup> T cells in tissue undergoing asymptomatic reactivation. Biopsy tissue obtained at 8 week post-healing time point from a subject undergoing asymptomatic HSV-2 reactivation was dual stained with Qdot 655 conjugated peptide-MHC complex, B\*0702/RPR, *UL49* aa 49-57 (red), anti-CD8α antibody (green), and counter stained with DAPI (blue). A projection of a 30-μm stack shows HSV-specific CD8<sup>+</sup> T cells localized at the DEJ and upper dermis. Bar: 100 μm.

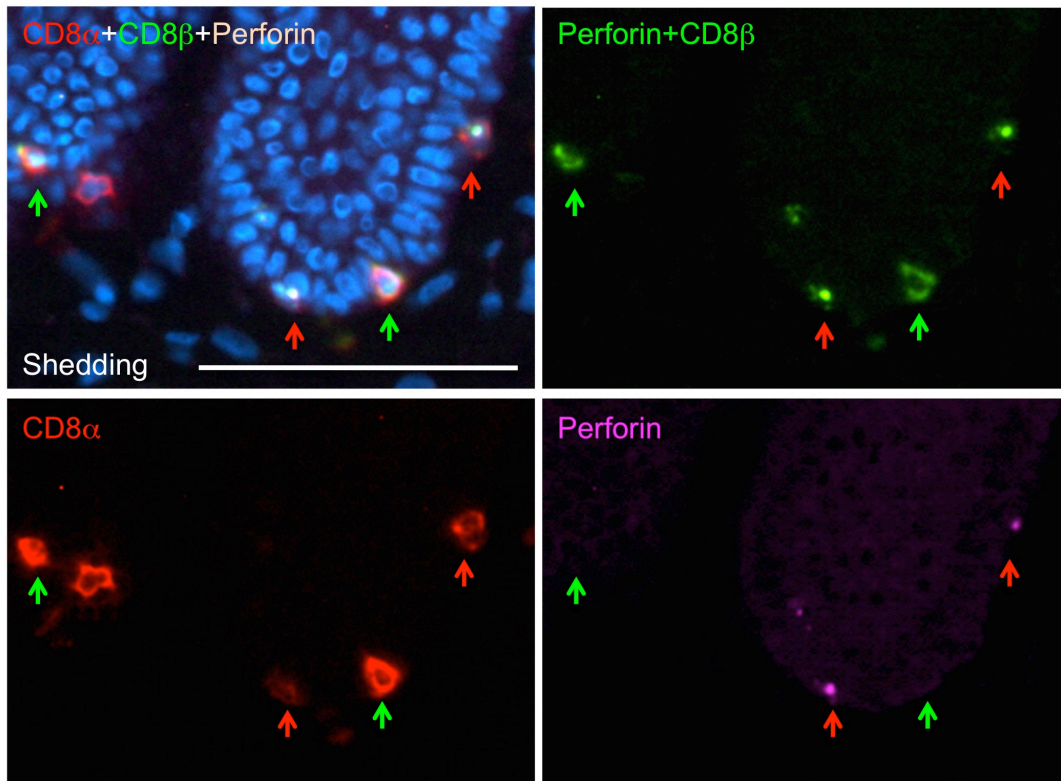

### Supplementary Figure 5

DEJ  $CD8\alpha^+$  T cells express perforin granules during asymptomatic shedding. Biopsy tissue was obtained at 8 weeks post-healing time point from a subject undergoing asymptomatic HSV-2 reactivation. Tissue was immunofluorescence stained using antibodies specific to  $CD8\alpha$  (red),  $CD8\beta$  (green), Perforin (both green and pink) and counter stained with DAPI (blue). Perforin granules (both green and pink dot) are detected in DEJ  $CD8\alpha\alpha$  ( $CD8\alpha^+\beta^-$  T cells, red only) as indicated by red arrows.  $CD8\alpha^+\beta^+$  T cells (red and green) that do not express perforin granule as indicated by green arrows. Bar: 100  $\mu$ m.

**Supplementary Table 1** CDR3 sequences and cognate V and J gene usage of dominant DEJ CD8 clones. List shows the top six most abundant DEJ CD8 clones in each biopsy.

| <b>Biopsy Stage</b>    | <b>Amino Acid Sequence</b> | <b>V Gene</b>     | <b>J Gene</b> | <b>Normalized Frequency</b> |
|------------------------|----------------------------|-------------------|---------------|-----------------------------|
| Newly Healed 03/2005   | CASRKTGIPSEQYF             | TRBV6-2/TRBV6-3   | TRBJ2-7       | 0.435                       |
|                        | CASSFRDGHYEQYF             | (undefined)       | TRBJ2-7       | 0.208                       |
|                        | CASSPDGQGGYTF              | TRBV19            | TRBJ1-2       | 0.154                       |
|                        | CASSYQARASWGYEQYF          | (undefined)       | TRBJ2-3       | 0.059                       |
|                        | CASSLLAGHTGELFF            | TRBV12-3/TRBV12-4 | TRBJ2-2       | 0.031                       |
|                        | CASRLDRGTLTDTQYF           | TRBV12-3/TRBV12-4 | TRBJ2-3       | 0.027                       |
| 2 wph* 04/2005         | CASSLLAGHTGELFF            | TRBV12-3/TRBV12-4 | TRBJ2-2       | 0.401                       |
|                        | CATRRTSGRYNEQFF            | TRBV5-1           | TRBJ2-1       | 0.212                       |
|                        | CASSHGYEQYF                | TRBV14            | TRBJ2-7       | 0.185                       |
|                        | CASSAGSLVYNEQFF            | TRBV7-3           | TRBJ2-1       | 0.141                       |
|                        | CASSPTRNTGELFF             | TRBV11-2          | TRBJ2-7       | 0.013                       |
|                        | CASRKTGIPSEQYF             | TRBV6-2/TRBV6-3   | TRBJ2-2       | 0.012                       |
| 4 wph* 04/2006         | CAISEPTSSSVTGELFF          | TRBV10-3          | TRBJ2-2       | 0.431                       |
|                        | CASSFDLGRSNQPQHF           | (undefined)       | TRBJ1-5       | 0.388                       |
|                        | CASSHGYEQYF                | TRBV14            | TRBJ2-7       | 0.047                       |
|                        | CATSRDRYGYTF               | TRBV15            | TRBJ1-2       | 0.038                       |
|                        | CASSPGRDWGSEQYF            | TRBV7-9           | TRBJ2-7       | 0.020                       |
|                        | CACGDSLIEQYF               | (undefined)       | TRBJ2-7       | 0.014                       |
| Healing Lesion 10/2006 | CASSLLAGHTGELFF            | TRBV12-3/TRBV12-4 | TRBJ2-2       | 0.291                       |
|                        | CASSMRVQPQHF               | TRBV19            | TRBJ1-5       | 0.260                       |
|                        | CASSQVASTDTQYF             | TRBV23-1          | TRBJ2-3       | 0.173                       |
|                        | CASSQEGGQGPSGANVLTFF       | TRBV3-1           | TRBJ2-6       | 0.062                       |
|                        | CASSEASGSTDTQYF            | TRBV6-4           | TRBJ2-3       | 0.045                       |
|                        | CASSIDPGEKGLFF             | TRBV19            | TRBJ1-4       | 0.017                       |
| 4 wph* 12/2006         | CASSDRDTGELFF              | TRBV6-4           | TRBJ2-2       | 0.474                       |
|                        | CASSLEPGQANEQFF            | (undefined)       | TRBJ2-1       | 0.202                       |
|                        | CASRKTGIPSEQYF             | TRBV6-2/TRBV6-3   | TRBJ2-7       | 0.063                       |
|                        | CASSLLKGGNYEQYF            | TRBV7-9           | TRBJ2-3       | 0.052                       |
|                        | CASRLDRGTLTDTQYF           | TRBV12-3/TRBV12-4 | TRBJ2-3       | 0.041                       |
|                        | CASSDRRDEQYF               | TRBV7-6           | TRBJ2-7       | 0.022                       |
| 8 wph* 10/2007         | CASSLLAGHTGELFF            | TRBV12-3/TRBV12-4 | TRBJ2-2       | 0.457                       |
|                        | CASSQEGGQGPSGANVLTFF       | TRBV3-1           | TRBJ2-6       | 0.380                       |
|                        | CASRKTGIPSEQYF             | TRBV6-2/TRBV6-3   | TRBJ2-7       | 0.048                       |
|                        | CATASAYEQYF                | TRBV24-1          | TRBJ2-7       | 0.045                       |
|                        | CASSQEGGQGPSGANVLTFF       | TRBV3-1           | TRBJ1-4       | 0.023                       |
|                        | CASSPGTGTGANVLTFF          | (undefined)       | TRBJ2-6       | 0.021                       |

\* weeks post-healing.

**Supplementary Table 2** CDR3 sequences and cognate V and J gene usage of DEJ CD8 clones commonly shared between multiple biopsies.

| <b>Amino Acid Sequence</b> | <b>V Gene</b>     | <b>J Gene</b> |
|----------------------------|-------------------|---------------|
| CASSLLAGHTGELFF            | TRBV12-3/TRBV12-4 | TRBJ2-2       |
| CASSQEGGQGPSGANVLT         | TRBV3-1           | TRBJ2-6       |
| CAISEPTSSSVTGELFF          | TRBV10-3          | TRBJ2-2       |
| CASRKTGIPSEQYF             | TRBV6-2/TRBV6-3   | TRBJ2-7       |
| CASSHGYYEQYF               | TRBV14            | TRBJ2-7       |
| CASSFRDGHYYEQYF            | (undefined)       | TRBJ2-7       |
| CATASAYEQYF                | TRBV24-1          | TRBJ2-7       |
| CASRLDRGTLTDTQYF           | TRBV12-3/TRBV12-4 | TRBJ2-3       |
| CASSPGTGTGANVLT            | (undefined)       | TRBJ2-6       |
| CASSLDVVGIEAFF             | TRBV11-2          | TRBJ1-1       |
| CASSDTYNSPLHF              | TRBV6-1           | TRBJ1-6       |
| CASSLRGLAGGPGTDTQYF        | TRBV7-3           | TRBJ2-3       |

**Supplementary Table 3** Identification of CD8<sup>+</sup> T cell clones shared among all three T cell populations obtained from the same subject: lesion infiltrating T cells, PBMC-derived CD8 $\alpha$ <sup>+</sup> T cells and HSV-2 reactive CD8<sup>+</sup> T cells isolated directly *ex vivo* from PBMC. Listed are CDR3 sequences and cognate V and J gene usage of 15 shared clonotypes.

| <b>Amino Acid</b> | <b>V Gene</b>     | <b>J Gene</b> |
|-------------------|-------------------|---------------|
| CASSAGLEAFF       | TRBV6-2/TRBV6-3   | TRBJ1-1       |
| CASKSGASNEQFF     | TRBV19            | TRBJ2-1       |
| CASSFRGTGELFF     | TRBV28            | TRBJ2-2       |
| CSAGGRVATGAWEQFF  | TRBV20-1          | TRBJ2-1       |
| CASSFWGNPVDEQFF   | TRBV7-2           | TRBJ2-1       |
| CASRLDRGTLTDTQYF  | TRBV12-3/TRBV12-4 | TRBJ2-3       |
| CASAGTSGVQETQYF   | TRBV19            | TRBJ2-5       |
| CASSDTGPGNSPLHF   | TRBV7-9           | TRBJ1-6       |
| CASSLWGSGPAFF     | TRBV7-2           | TRBJ1-1       |
| CAITGGDTYEQYF     | TRBV10-3          | TRBJ2-7       |
| CASSLGQAYEQYF     | TRBV7-8           | TRBJ2-7       |
| CARASMGTEAFF      | TRBV2             | TRBJ1-1       |
| CAWNPIGEGTEAFF    | TRBV30            | TRBJ1-1       |
| CASRPPGAQDTQYF    | TRBV7-9           | TRBJ2-3       |
| CASGGRGSSYEQYF    | TRBV10-2          | TRBJ2-7       |



**Supplementary Table 4** Antibody resources.

| <b>Antibody</b>                   | <b>Clone</b> | <b>Manufacturer</b> |
|-----------------------------------|--------------|---------------------|
| CD3 $\epsilon$ , purified         | UCH-T1       | Santa Cruz          |
| CD4, purified                     | RPA-T4       | Biolegend           |
| CD8 $\alpha$ , purified           | RPA-T8       | BD Pharmingen       |
| CD8 $\alpha$ AF647                | RPA-T8       | BD Pharmingen       |
| CD8 $\beta$ , purified            | F-5          | Santa Cruz          |
| CD11c, purified                   | B-ly6        | BD Pharmingen       |
| CD16, purified                    | 3G8          | Biolegend           |
| CD56, purified                    | MEM-188      | Biolegend           |
| HSV-2, purified                   | Polyclonal   | Dako                |
| Perforin, purified                | dG9          | eBioscience         |
| Pan TCR $\gamma\delta$ , purified | 5A6.E91      | Pierce antibodies   |
| TCR $\beta$ , purified            | 8A3          | Pierce antibodies   |

**Supplementary Table 5** Applied Biosystems primer/probe sets used for Taqman PCR assays.

| <b>Gene</b>  | <b>Assay ID</b> |
|--------------|-----------------|
| <i>ACTB</i>  | Hs03023880_g1   |
| <i>CD4</i>   | Hs00181217_m1   |
| <i>CD8A</i>  | Hs00233520_m1   |
| <i>CD8B</i>  | Hs00174762_m1   |
| <i>CCR7</i>  | Hs01013469_m1   |
| <i>GZMA</i>  | Hs00989184_m1   |
| <i>GZMB</i>  | Hs00188051_m1   |
| <i>IFNG</i>  | Hs00989291_m1   |
| <i>PRF1</i>  | Hs00169473_m1   |
| <i>SIPRI</i> | Hs01922614_s1   |
| <i>TNFA</i>  | Hs00174128_m1   |
